# Supplementary material
Source: MDPI journal article supplement (https://www.mdpi.com/2311-7524/7/6/123)
Supplement: s1 [file s1]

# Supplementary Materials: Transcriptome Co-Expression Network Analysis Identifies Key Genes and Regulators of Sweet Cherry Anthocyanin Biosynthesis

Haiying Yang, Changping Tian, Xiwen Li, Hansheng Gong and Aidi Zhang

**Table S1.** Anthocyanin biosynthesis structural genes and TFs.

| Gene             | NCBI accession               | Genome number                    | Reference                | Full name                                  |
|------------------|------------------------------|----------------------------------|--------------------------|--------------------------------------------|
| <i>PacANS</i>    | XP_021803569.1<br>AEO79983.1 | <i>Pav_sc0000107.1_g100.1.mk</i> | Liu <i>et al.</i> , 2013 | anthocyanidin synthase                     |
| <i>Pac4CL2</i>   | XP_021816145.1               | <i>Pav_sc0000636.1_g260.1.mk</i> |                          | 4-coumarate-CoA ligase                     |
| <i>PacbHLH13</i> | XM_021959322.1               | <i>Pav_sc0000586.1_g190.1.mk</i> |                          | basic helixloop-helix transcription factor |
| <i>PacbHLH74</i> | XP_021828015.1               | <i>Pav_sc0001519.1_g020.1.mk</i> |                          | basic helixloop-helix transcription factor |
| <i>PacDIV</i>    | XP_021814588.1               | <i>Pav_sc0000580.1_g150.1.mk</i> |                          | DIVARICATA transcription factor            |
| <i>PacERF109</i> | XP_021824713.1               | <i>Pav_sc0000071.1_g750.1.mk</i> |                          | ethylene responsive transcription factor   |
| <i>PacERF115</i> | XP_021814656.1               | <i>Pav_sc0000042.1_g600.1.mk</i> |                          | ethylene responsive transcription factor   |
| <i>PacGATA8</i>  | XP_021826743.1               | <i>Pav_sc0000084.1_g450.1.mk</i> |                          | GATA transcription factor                  |
| <i>PacGT2</i>    | XP_021810680.1               | <i>Pav_sc0000378.1_g010.1.mk</i> |                          | GT transcription factor                    |
| <i>PaGTE10</i>   | XM_021975465.1               | <i>Pav_sc0002130.1_g020.1.mk</i> |                          | GTE transcription factor                   |
| <i>PacMYB308</i> | MW310249                     | <i>Pav_sc0000373.1_g330.1.mk</i> |                          | MYB transcription factor                   |
| <i>PacPosF21</i> | XP_021803476.1               | <i>Pav_sc0012575.1_g010.1.mk</i> |                          | PosF21 transcription factor                |
| <i>PacWRKY7</i>  | XP_021820223.1               | <i>Pav_sc0000852.1_g460.1.mk</i> |                          | WRKY transcription factor                  |

The partial sequences were confirmed by QPCR products resequencing with ‘Hong Deng’ fruit cDNA as template.

**Table S2.** Primers for real-time PCR.

| Gene             | Forward (5' to 3')       | Reverse (5' to 3')      |
|------------------|--------------------------|-------------------------|
| <i>PacANS</i>    | GCCAAAGTGTGTTCCAAATTCCA  | GATCTTCTCCTTTGGTGGCTCA  |
| <i>Pac4CL2</i>   | CCTGTTGCATTTGTGGTTCGAT   | GCTTGGCTCTCAGGTCTTTTCT  |
| <i>PacbHLH13</i> | GAGGTTGTTGTAAGGGTGAGCT   | CTTTTCCTTCGTCAATGGCTCG  |
| <i>PacbHLH74</i> | GGAATCAGCTCTTCTCACCCAT   | TGATTTCAAGCGGCCATTTTGT  |
| <i>PacDIV</i>    | GTGACTGGCATGAGTGAACAAC   | GCATCTGAAAACGCGCATTGTA  |
| <i>PacERF109</i> | GGGCAAAGTCAATCCAATTACTGT | AGCATGAGGTATTGTAGTTGGCT |
| <i>PacERF115</i> | ACCATATGTTCAAGGCGGAAGT   | CGAACGAGAAGAACCAAACCTGC |
| <i>PacGATA8</i>  | AAAACCCCTATGCAATGCCTGTG  | AGATGCTGCTGTTAGTATTCGG  |
| <i>PacGT2</i>    | ATGTGGTTATGTTGCGCTGCTC   | CCATCTCCATCTGCATTTTCATC |
| <i>PaGTE10c</i>  | CAGGCTGGGTAGTTTCAAGCTA   | TCATTTGCTGCTTCTGGTTTGG  |
| <i>PacMYB308</i> | CTTTTCTTGCAAGTTTGGGGCTT  | CATCTCCAAGCTTCTGTAATCC  |
| <i>PacPosF21</i> | TGGGCCTATGATGAACTTTGCT   | ATCCTCCCATTTTCAAGTCCCC  |
| <i>PacWRKY7</i>  | CTGCCACTGTTCCAAGAAAAGG   | CAGCATGGTTGGATCGTCTAGA  |
| <i>Actin</i>     | CCAGGGCTGTGTTTCCTTCTA    | ATGATCTGCGTCATCTTTTCT   |

**Table S3.** Sequences (5' to 3') for promoter isolation.

| Gene          | Promoter Sequence                                                                                                                                                                                                                                                                                                                                                                                                                                                                                                                                                                                                                                                                                                                                                                                                                                                                                                                                                                                                                                                                                                                                                                                                                                                                                                                                                                                                                                                                                                                                                                                                                                                                                                                                                                                                                                                                                                                                                                                                                             | Length (bp) |
|---------------|-----------------------------------------------------------------------------------------------------------------------------------------------------------------------------------------------------------------------------------------------------------------------------------------------------------------------------------------------------------------------------------------------------------------------------------------------------------------------------------------------------------------------------------------------------------------------------------------------------------------------------------------------------------------------------------------------------------------------------------------------------------------------------------------------------------------------------------------------------------------------------------------------------------------------------------------------------------------------------------------------------------------------------------------------------------------------------------------------------------------------------------------------------------------------------------------------------------------------------------------------------------------------------------------------------------------------------------------------------------------------------------------------------------------------------------------------------------------------------------------------------------------------------------------------------------------------------------------------------------------------------------------------------------------------------------------------------------------------------------------------------------------------------------------------------------------------------------------------------------------------------------------------------------------------------------------------------------------------------------------------------------------------------------------------|-------------|
| <i>PacANS</i> | CCCTTATTAAATATAGGGCCTCTTAAATATATTGACTTTCATATTTCCCTCAATTTATCT<br>TTTAATTTTTTTTACAATTTTCTATTATCTTGTTAAAAAATTAATTTAAAGTGATATAT<br>CATATATTGATGAAGAATCACGTGTGTGGTGAAAAATTCAAATTCACGTGGAAACAA<br>ACATGCATGAACATGCCTGGGTCTTGAATGTATGTTGATGTTCAAATCGTTGGAATGA<br>TGTAGGTGTTCCAAGAATTTTTTTTACCATCCCATCCATTTCCGCCACCTGGGATAAA<br>TTTTAGGTGTGTTTCTGCTGAATATTTTTTTTTTAAATAAAAAATTTCTGTTAAAGA<br>CTAATCCTACGGCAATTGGATTGATTGTAAGTTTGATTTTTACGCTCTTTTAAAAAATT<br>GATGTTTTTTTTTCTTATTTAATTTTTAACGAGATGATAAGAAAGTTGTAACAAAAA<br>TTGATAAATTGAAAGAAACATAAAGGTTAATACATTTAATAAGGGTAAATTAGGAAA<br>ACAAAAGCTAGCTTGTCTCGAGTATTAATGATATTGTTTAAAGTGTAAGTAAAGTGA<br>CACATGTCATTAGAAAAAGCGGGCAGATCCAAAAGAAAAGATTAGAGACAAGGTT<br>GCTAGAATTCCCCTGTATCCAAATGTCACCAACAAAACAAGCTAGCTTGCCTCTGTT<br>TGGTCTTGTTGAACCTTGTTTGCTTACTGGTAGGTAGGAAAAACGTGCTCAACAAA<br>ACAAGCGATATATGGTGGTTTTATGAGAATGGAACCTCAACGCCCCGCTGATTTGTGG<br>CACCAATTCAGGCCCGTAGTGTGGATGAGGAAGGAACTTTCTAGCTATTGATACAAC<br>CTACTTATAACTCTTTAAATTAATATATTAACATGAAAAAGTCAAAGAAGCAATA<br>AATTCGAGATCACAACGTTACTTGTACGGACTTATAGCTCTAGTGGCAGAAAAAATA<br>AACACTGCTTATGACAAGAGTCTAACTCTTGCCCTTTTCTATTGAATACAAAGAACG<br>TGGATTTATGAAACCAAATAAATCATTAGGGTAACTTGGGCTCAAAGTTTGAAATATT<br>AGCAAAATGCTTGTAGCTCAAATGGATAAAAGTATTTACACTTGAGATTGATCGTGT<br>ACTCGATTCTCCCCCTCCCGATAACATCTCTACAGAAAATAAAATAGAGAGTTTGGA<br>TTATTAGTCCAGTGAAATAAGGTATAATTGGAAGTGGTTCTAATGCTACATATGCTCA<br>GGCATAAATTGGAATGCAACTAATAAACATGTAGGTGTAGCCCTTAATCTATCTACCG<br>TGCTTAGGGGCCTCTTTGTTCAAGGTAGCCAAATGTGTGATTAATTATTAGTTTTAG<br>AGTAAAAATATAAACTAATTAGTTTCTAGAACAATGCATTTAAATGCTATAGTTAGG<br>CAATGAAGAACAGAAAGTCTTGTAGCTGGCACTGTCTGAAACTCTGAAAGGACGGAT<br>ATGGTTGTAGCTTAAATCCCATGCATGCTCACTTGCCAGTCAAACCTTCCTTGATGA<br>GAAGTCCGGTGGGTGAGAAGTGTACATGGACAACAGACCCAAAATCACACAAAT<br>TCAACACAAACACATTCTCCACTCTCTCTGTTGGCAAGAAGTTCCCTTGAAAT<br>ATAAGCACCTCCAACCTACTAATTGGGTACACTACTATAAAAGCAACATTACCAATAC<br>ACCATTAACCATTTGCTTCATCAATCCACCATAAGAAAAGAGCATAGGCCTGCACTT<br>TTAGTGTAATAAAGCTATTAAAGAAAGCTAGCCAAGAGTTCAGAGCTTACGAAGAG<br>CCGGCTGCCAAA | 1850        |

**Table S4.** Primers for vector construction for dual-luciferase assays.

| Gene             | Forward (5' to 3')                               | Reverse (5' to 3')                                 |
|------------------|--------------------------------------------------|----------------------------------------------------|
| <i>PacANS</i>    | TCGACGGTATCGATAAGCTTCCC<br>TTATTAAATATAGGGCCCC   | GCTCTAGAACTAGTGGATCCTTTG<br>GCAGCCGGCTCTTCGTAAG    |
| <i>PacbHLH13</i> | GCTCTAGAACTAGTGGATCCATG<br>GTTCCAGTGCCAAAGAAGGAC | TCGACGGTATCGATAAGCTTCTACC<br>CAACCGATGACAATGACTG   |
| <i>PacbHLH74</i> | GCTCTAGAACTAGTGGATCCATG<br>GGTGGTCATGACAGTGAGGA  | TCGACGGTATCGATAAGCTTTTATA<br>GCTCTGATTTCAAGCGGC    |
| <i>PacDIV</i>    | GCTCTAGAACTAGTGGATCCATG<br>TACAGAGGAATTGGAATTC   | TCGACGGTATCGATAAGCTTTTCACT<br>GGTATCGCATCGATTGC    |
| <i>PacERF109</i> | GCTCTAGAACTAGTGGATCCATG<br>CCCTTGACGCCAATCGCAT   | TCGACGGTATCGATAAGCTTTTATC<br>CTGGCTTCATCAAAGCAG    |
| <i>PacERF115</i> | GCTCTAGAACTAGTGGATCCATG<br>ATTTCAGCTCTAGCTCAGG   | TCGACGGTATCGATAAGCTTTTCATC<br>TTGAGTGACTGCCTTCA    |
| <i>PacGATA8</i>  | GCTCTAGAACTAGTGGATCCATG<br>ATCGGAACTTCATCGACG    | TCGACGGTATCGATAAGCTTTTCAC<br>ATGTAATCCATGGAGATGC   |
| <i>PacGT2</i>    | GCTCTAGAACTAGTGGATCCATG<br>CTCGAAAATTCAAAGTTACC  | TCGACGGTATCGATAAGCTTTTCAG<br>CTCATAATTGCCATTGAAG   |
| <i>PaGTE10</i>   | GCTCTAGAACTAGTGGATCCATG<br>GCACCAACTGTTCCAATAGAC | TCGACGGTATCGATAAGCTTTTCAAT<br>CAATCTCTCCTTCTTCAAAG |
| <i>PacMYB308</i> | GCTCTAGAACTAGTGGATCCATG<br>GGAAGATCTCCTTGCTGTG   | TCGACGGTATCGATAAGCTTTTCATT<br>TCATCTCCAAGCTTCTG    |
| <i>PacPosF21</i> | GCTCTAGAACTAGTGGATCCATG<br>GATAAGGACAAGTCTCCTGC  | TCGACGGTATCGATAAGCTTTTAAC<br>AATCCTTCGTTACAGATTGG  |
| <i>PacWRKY7</i>  | GCTCTAGAACTAGTGGATCCATG<br>GCTGTGGAGCTCATGATGGG  | TCGACGGTATCGATAAGCTTTTAAG<br>ATGATTCGAGGACGAGAGC   |

The *PacANS* promoter was constructed to pGreen II 0800-LUC vector, and full-length sequences of TFs were constructed to pGreen II 0029 62-SK vector.

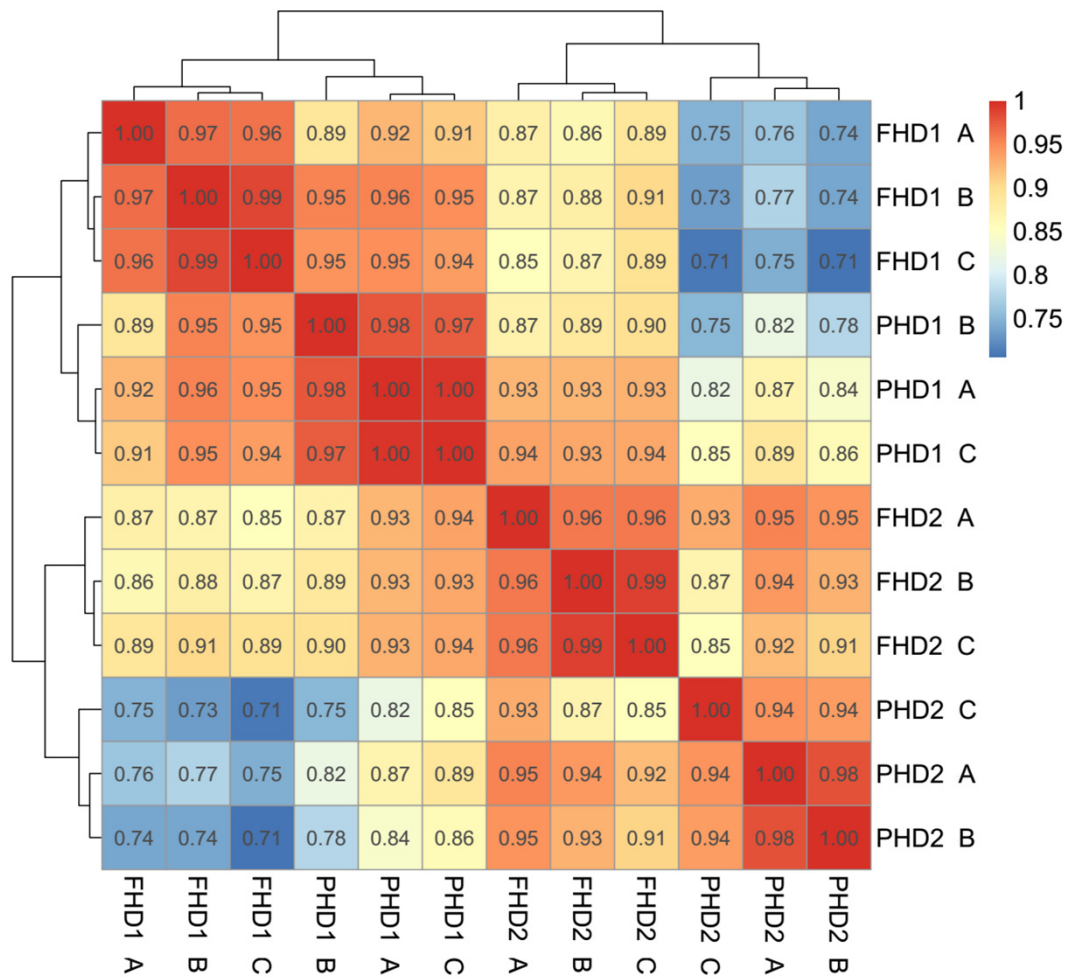

**Figure S1.** Pearson correlation analysis between three biological replicates.

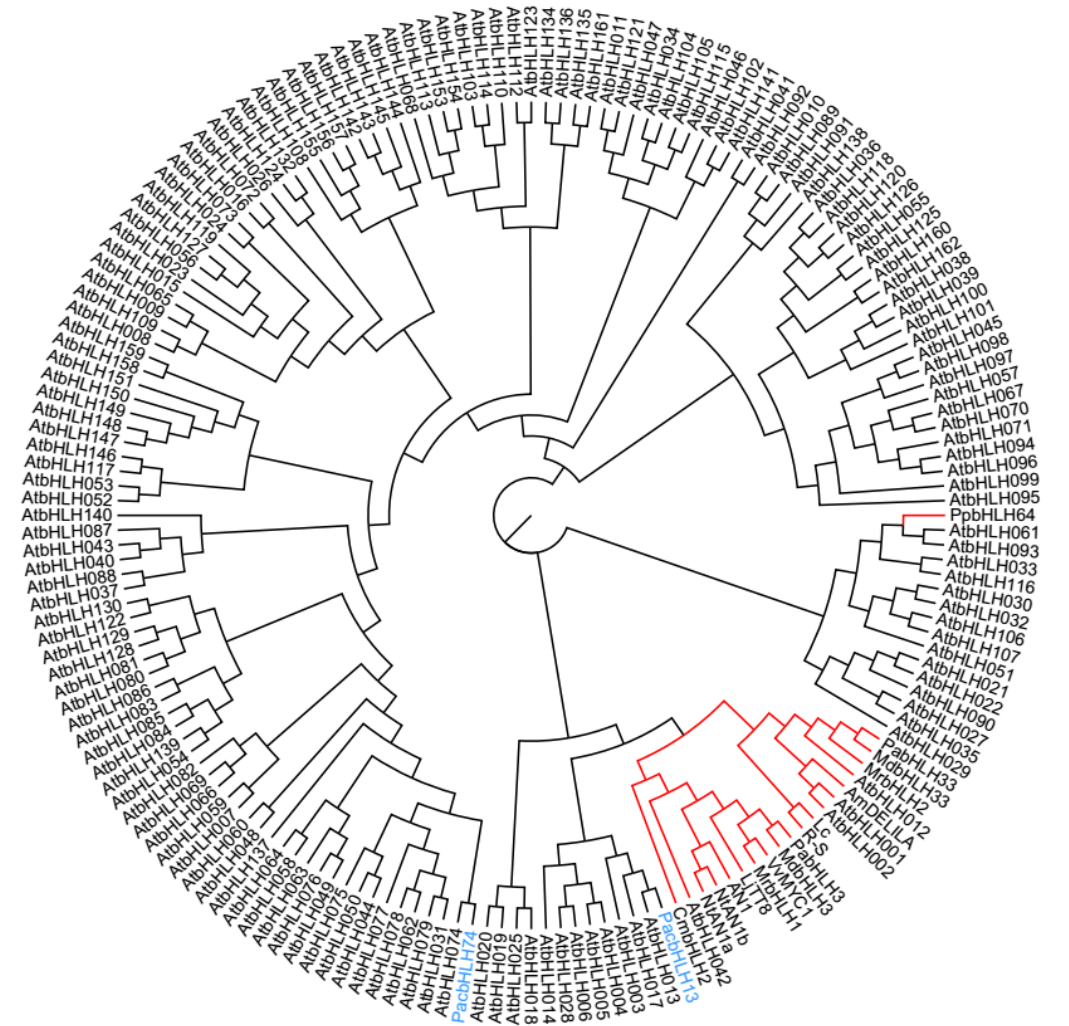

1.0

**Figure S2.** Phylogenetic tree analysis of *PacbHLH13/74* with *Arabidopsis thaliana* *bHLH* sequences and anthocyanin synthesis related *bHLHs* in other species (red line). GenBank accession number: *MdbHLH3*, HM122458; *MdbHLH33*, DQ266451; *MrbHLH1*, JX629461; *MrbHLH2*, JX629462; *AmDELILA*, AAA32663; *Lc*, NM001111869; *R-S*, X15806; *VvMYC1*, EU447172; *LjTT8*, BAH28881; *AN1*, AF260918; *NtAN1a*, AEE99257; *NtAN1b*, AEE99258; *CmbHLH2*, KT724056; *PabHLH3*, KP126522; *PabHLH33*, KP126523; *PpbHLH64*, Pbr001646.1). The deduced amino acid sequences of *Arabidopsis thaliana* *bHLHs* were obtained from TAIR. The phylogenetic trees were constructed using FigTree (v1.4.2).
